# Supplementary material for: Analysis of water use impact assessment methods (part A): evaluation of modeling choices based on a quantitative comparison of scarcity and human health indicators
Source: Springer Nature journal article supplement (doi:10.1007/s11367-014-0814-2), 2014-10-29
Supplement: MOESM1 [file 5819902]

Electronic Supplementary Material

***Note: Section numbers refer to the main paper’s sections to which the information is being added.***

1. **Introduction**

***Fig.S1: General water use impacts framework (adapted from Kounina et al). The dotted rectangle highlights the impact pathway for which methods are compared in this paper.***

***Table S1: Summary of methods and their names***

| ***Impact assessed*** | ***Reference*** | ***Name*** | ***Details*** |
| --- | --- | --- | --- |
| ***Scarcity*** | Frischknecht, 2008 | M-SwissSc | Midpoint, scarcity, withdrawal-to-availability, power function |
| Pfister, 2009 | M- PfisterSc | Midpoint, scarcity, withdrawal-to-availability, logistic function |
| Hoekstra, 2012 | M-BWSSc | Midpoint, scarcity, consumption-to-availability, direct function |
| Boulay, 2011 | M-BoulaySc | Midpoint, scarcity, consumption-to-availability, logistic function |
| ***Availability*** | Boulay, 2011 | M-BoulayAv | Midpoint, availability, consumption-to-availability (quality specific), logistic function |
| Veolia, 2010 | M-WIIXAv | Midpoint, availability, withdrawal-to-availability and distance to target for pollution |
| ***Human Health*** | Pfister, 2009 | E-Pfister | As published, agricultural deprivation |
| Motoshita, 2010a | E-Motoshita_dom | Effect factor as published, domestic deprivation, then combined with M-PfisterSc and distribution factor (DAU) |
| Motoshita, 2010b | E-Motoshita_agri | Adapted from presentation, agricultural deprivation including trade effect , then combined with M-PfisterSc and distribution factor (DAU) |
| E-Motoshita_agri (no TE) | Adapted from presentation, agricultural deprivation excluding trade effect , then combined with M-PfisterSc and distribution factor (DAU) |
| Boulay, 2011 | E-Boulay_marg | Simplified from publication (no quality), considers agriculture as off-stream user deprived (100%) and aquaculture as in-stream user deprived. |
| E-Boulay_distri | Simplified from publication (no quality), considers off-stream users to be deprived proportionally to their use (agriculture and domestic are included) and aquaculture as in-stream user deprived. |
| E-Boulay_agri | Simplified from publication (no quality), represents a partial factor from E-Boulay_distri for comparison purposes, only for agricultural users. |
| E-Boulay_dom | Simplified from publication (no quality), represents a partial factor from E-Boulay_distri for comparison purposes, only for domestic users. |
| E-Boulay_marg_Q | As published, considers agriculture as off-stream user deprived (100%) and aquaculture as in-stream user deprived. |
| E-Boulay_distri_Q | As published, considers off-stream users to be deprived proportionally to their use (agriculture and domestic are included) and aquaculture as in-stream user deprived. |
| E-Boulay_agri_Q | Represents a partial factor from E-Boulay_distri for comparison purposes, only for agricultural users. |
| E-Boulay_dom_Q | Represents a partial factor from E-Boulay_distri for comparison purposes, only for quality users. |

- - 1. Scarcity indicators

Fig.S2 plots the normalized scarcity indicators from all methods against the WTA index. The underlying data used to calculate this latter (WaterGap), differs from the ones used in M-SwissSc, which explains the observed inconsistency of the data series. Please note that all values equal zero (60% of values for M-Boulay-Sc), cannot be shown on the graph. The average values described in section 2.3 is also shown.

***Fig.S2: Log graph of normalized scarcity methods against WTA for the main watersheds showing spread and differences among methods.***

- - 1. Human health: Domestic user deprivation

b)

a)

***Fig.S3: Comparison of human health model outcomes from domestic water deprivation impact pathways using Boulay and Motoshita models. A) CF and b) socio-economic and effect factor (SEE), which excludes scarcity and distribution of affected users.***

- - 1. Human health: Agricultural user deprivation

While the consistency is higher between E-Motoshita_agri without trade effect and the two other models then it is with trade effect included, the mean difference between models decreases in comparison with E-Pfister but increases when comparing with E-Boulay_agri. This is because E-Boulay_agri shows higher results in general, and the addition of the trade effect increases the results as well in E-Motoshita_agri.

***Fig.S4: Comparison of agriculture water deprivation impacts on human health. a) complete CF, b) Socio-economic and effect factors and c) effect factors only.***

- - 1. Inventory-related choices

***Temporal variations***

***
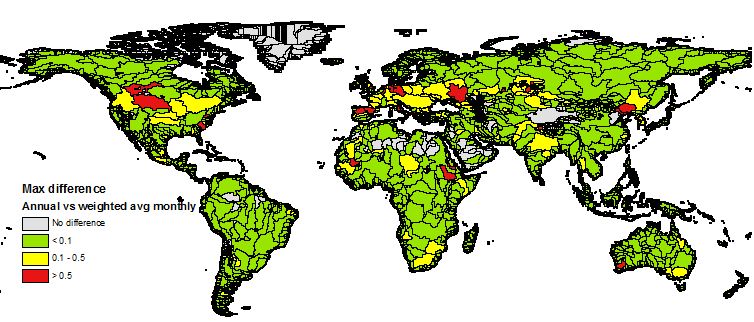
***

***Fig.S5: Difference between annual scarcity indicators calculated from annual data vs. from a withdrawal-based weighted average of monthly data. Results are obtained with M-PfisterSc which scarcity indexes range from 0.01 to .1***

***Water Source***


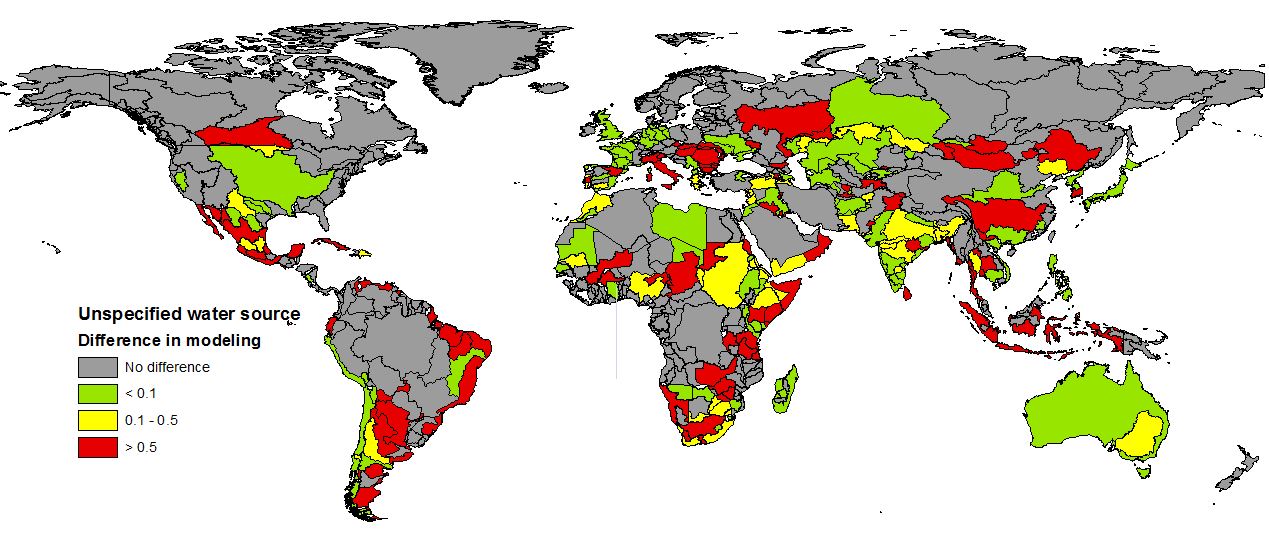


***Fig.S6: Absolute difference in scarcity results between general scarcity indicators calculated using all water use and availability and weighted-average of surface and groundwater scarcities, based on intensity of groundwater withdrawals. Results are obtained using M-Boulay-Sc, which values range between 0 – 1.***

***Quality aspect***

Out of the 600 regions of the world for which data was available (based on Boulay et al[30]), scarcity indicators are higher when consuming water of good quality then of unspecified quality in 42% of the cases. No difference is observed for the rest of the cases (58%), representing regions where general scarcity is already maximal (value of 1). Consuming water of poor quality results in higher stress in about 21% of the cases, corresponding to region where water quality is very poor. No difference is observed in 79% of cases, i.e. in regions where the average water quality is poor. Degrading good quality into very poor quality, will result in higher impacts than consuming general water (quality non-specified) in 39% of the cases, in countries with no general water scarcity, but with good quality water scarcity. These will present impacts when considering water of a certain quality but not when considering all water available.

- - 1. Scarcity

b)

a)

***Fig.S7: Different model functions defining scarcity as a function of CTA a) normal scale and b)log scale.***

3.2.3
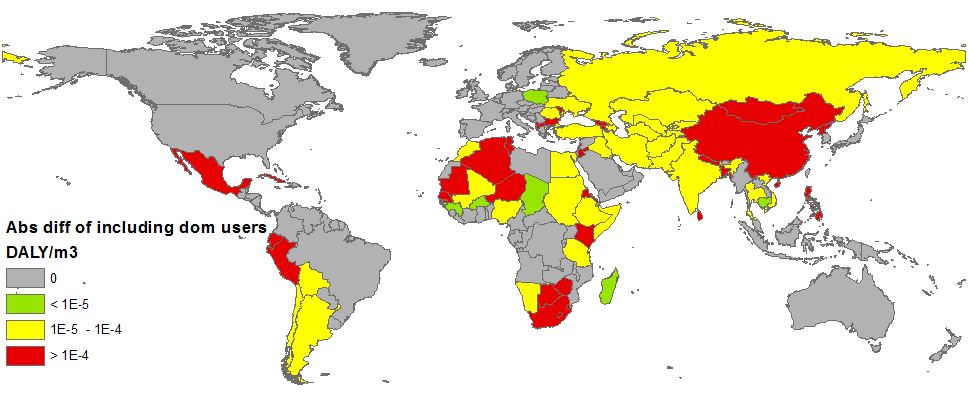


***Fig.S8: Difference of including or not domestic users***
